# Supplementary material
Source: Springer Nature journal article supplement (https://www.springermedizin.de/resource/supplementary/13058_2010_2741_MOESM3_ESM.pdf/9702052)

**Non-pregnant:**

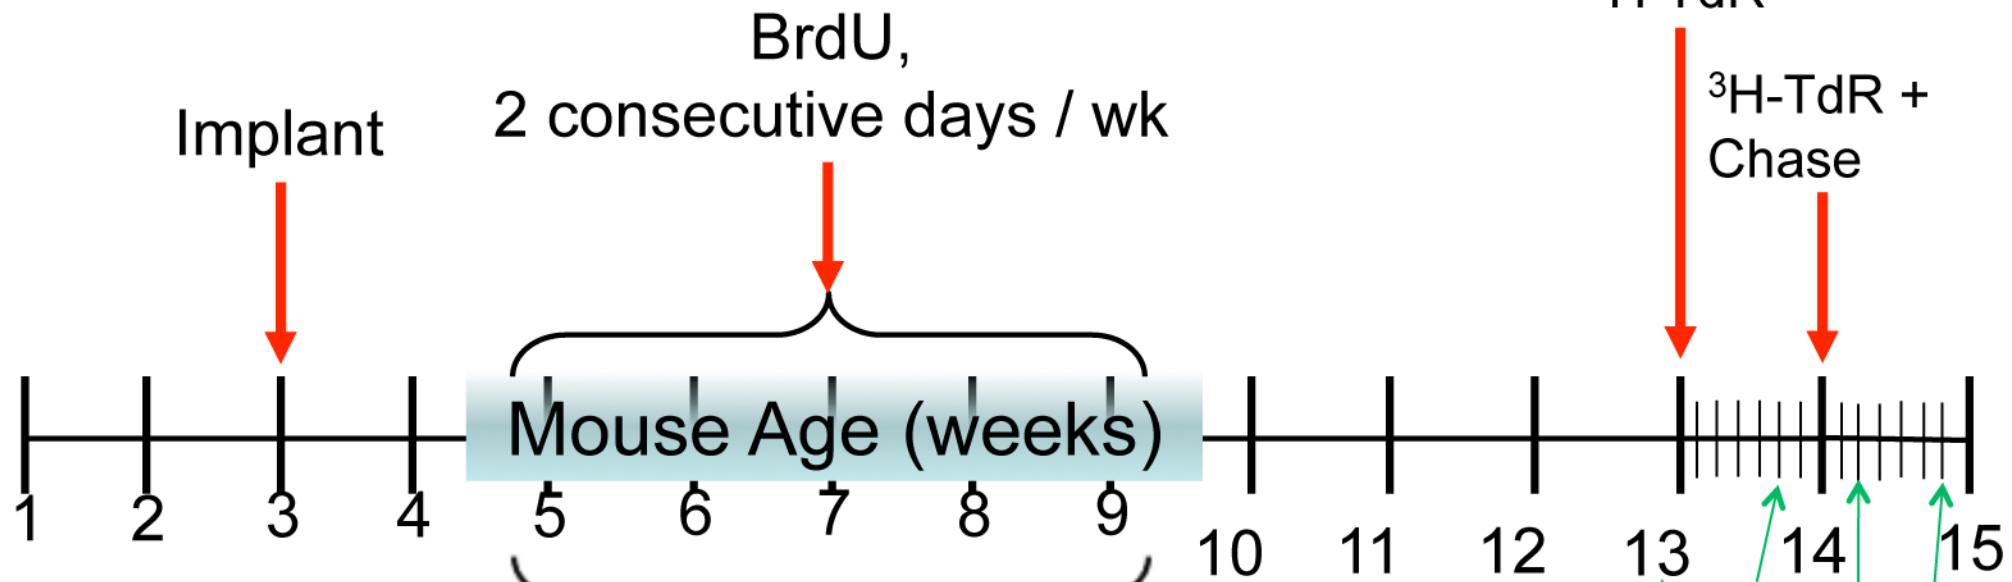

**Pregnant:**

Implant

BrdU, 2 consecutive days / wk

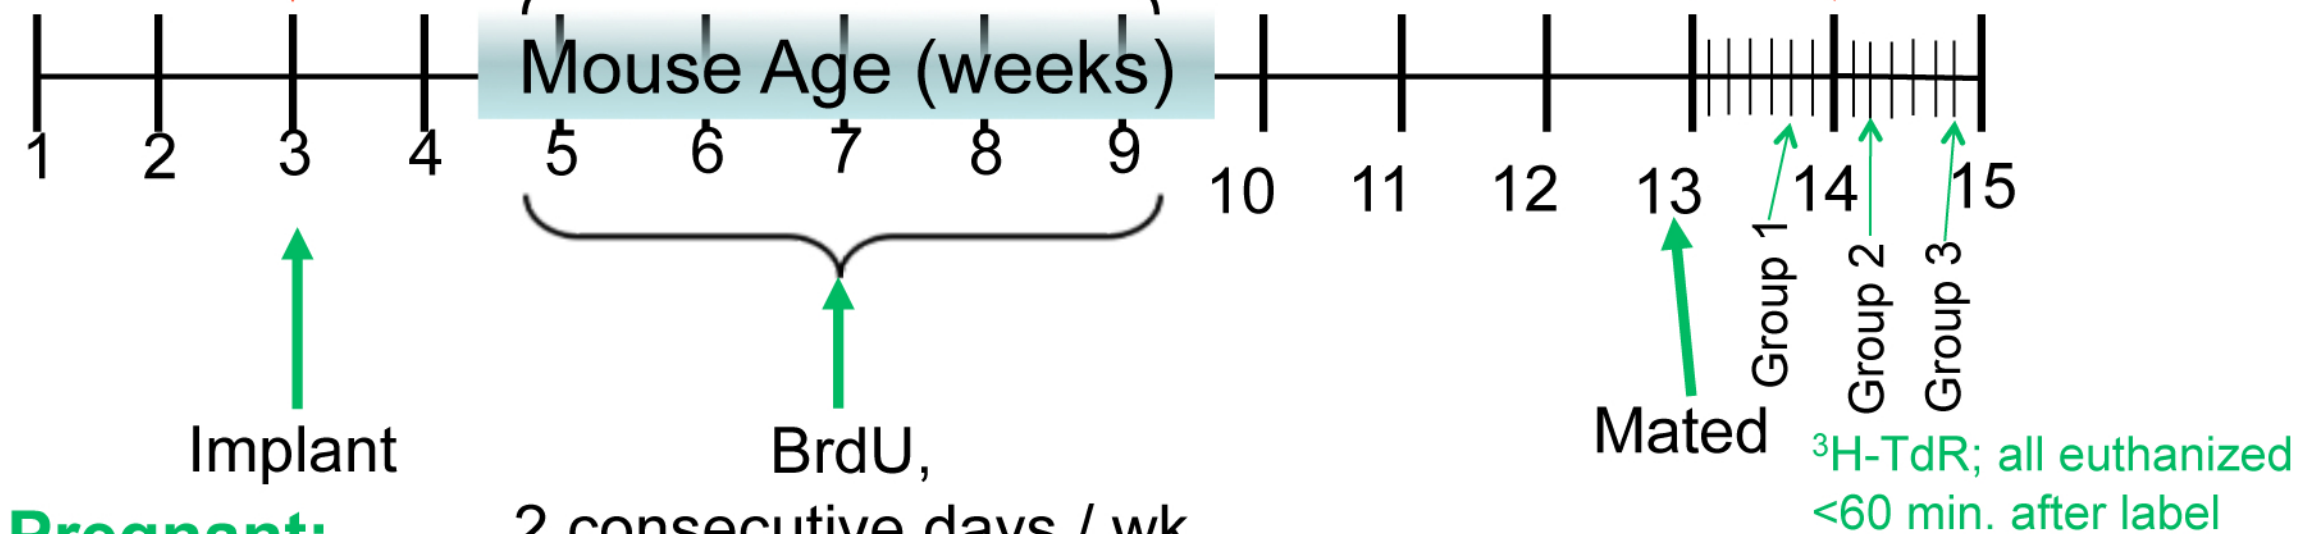

Supplement: MOESM3 [file 9702052]
